# Supplementary material for: Graft-Versus-Host Disease Prevention by In Vitro-Generated Myeloid-Derived Suppressor Cells Is Exclusively Mediated by the CD11b+CD11c+ MDSC Subpopulation
Source: PubMed Central journal article supplement (PMC8551363; doi:10.3389/fimmu.2021.754316), 2021-10-14
Supplement: DataSheet_1.pdf [file DataSheet_1.pdf]

**A**

1. Isolation of CD11b<sup>+</sup>CD11c<sup>+</sup> MDSCs

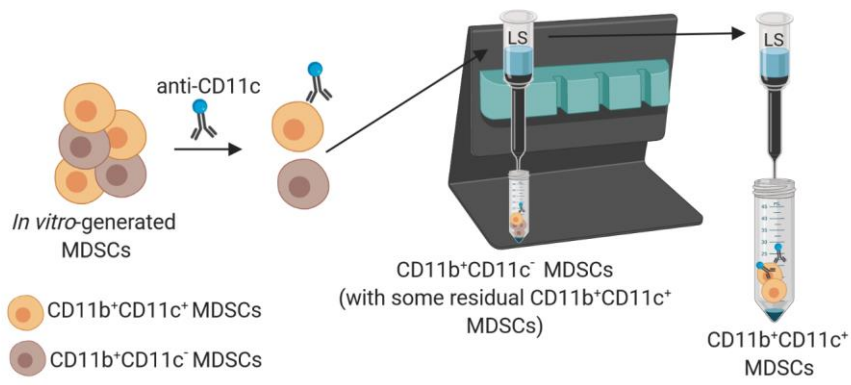

2. Isolation of CD11b<sup>+</sup>CD11c<sup>-</sup> MDSCs

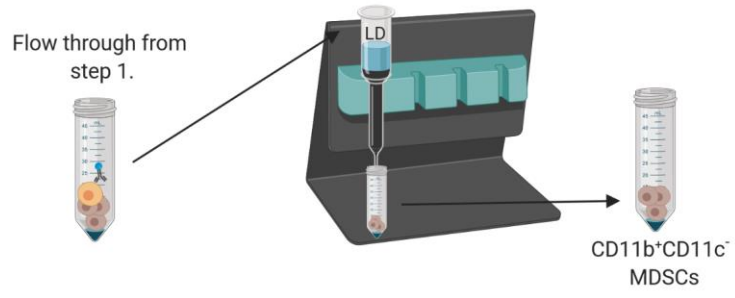**B**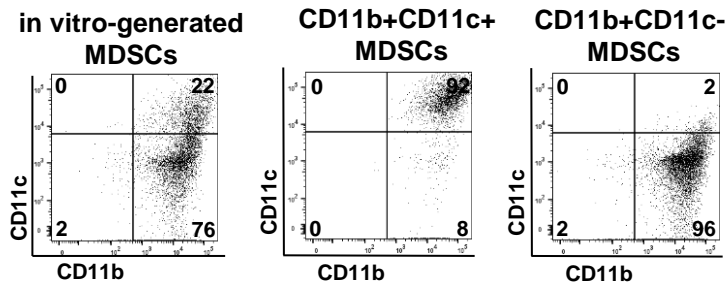

**Suppl. Figure 1: Isolation of CD11b<sup>+</sup>CD11c<sup>+</sup> and CD11b<sup>+</sup>CD11c<sup>-</sup> MDSCs.** (A) MDSC subpopulations were isolated from *in vitro*-generated MDSCs by MACS technology. CD11b<sup>+</sup>CD11c<sup>+</sup> MDSCs were isolated by anti-CD11c MicroBeads and performing a positive selection with LS columns. CD11b<sup>+</sup>CD11c<sup>-</sup> MDSCs were isolated from the flow through of the CD11b<sup>+</sup>CD11c<sup>+</sup> isolation. To deplete remaining CD11b<sup>+</sup>CD11c<sup>+</sup> cells from the flow through, flow through was loaded on depleting LD columns. (B) Data show a representative flow cytometry graph indicating purity of isolated CD11b<sup>+</sup>CD11c<sup>+</sup> and CD11b<sup>+</sup>CD11c<sup>-</sup> MDSC subpopulations isolated from *in vitro*-generated MDSCs. (A) Figure created with Biorender.com. (B) FACS diagrams of one representative experiment are shown.

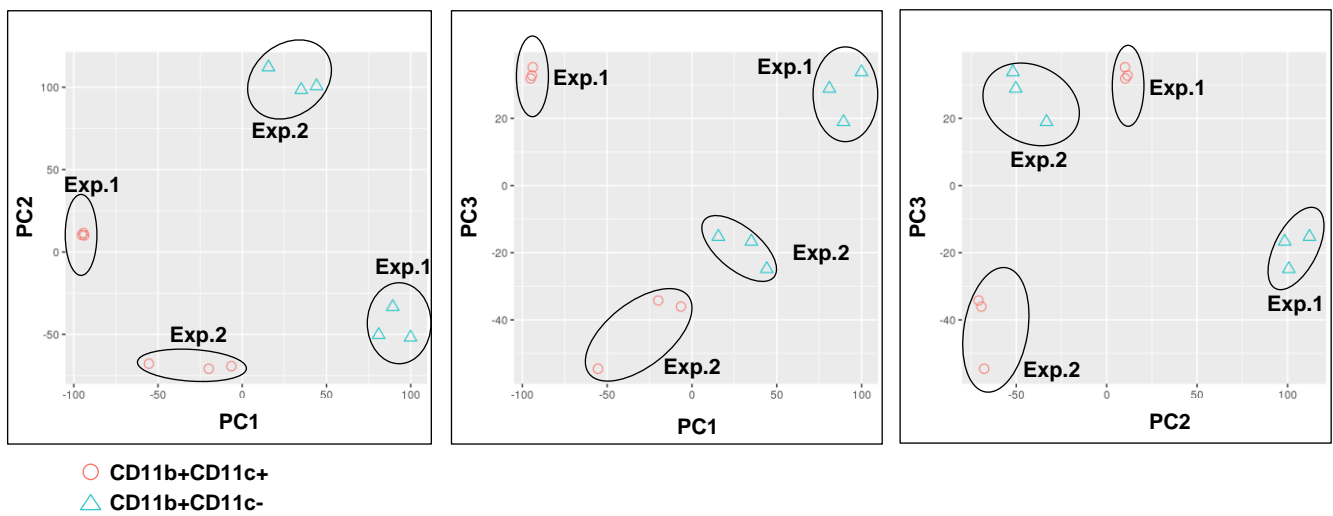

**Suppl. Figure 2: Principal component analysis (PCA) recapitulates strong differences in the transcriptome between CD11b+CD11c+ and CD11b+CD11c- MDSCs.** CD11b+CD11c+ and CD11b+CD11c- MDSCs were isolated from in vitro-generated MDSCs after 4 days in culture. Principal component analysis was performed with three samples/ group from two independent performed experiments. Each dot/triangle represents one array sample. In both experiments PCA analysis clearly separated two clusters corresponding to the CD11b+CD11c+ and CD11b+CD11c- MDSCs.

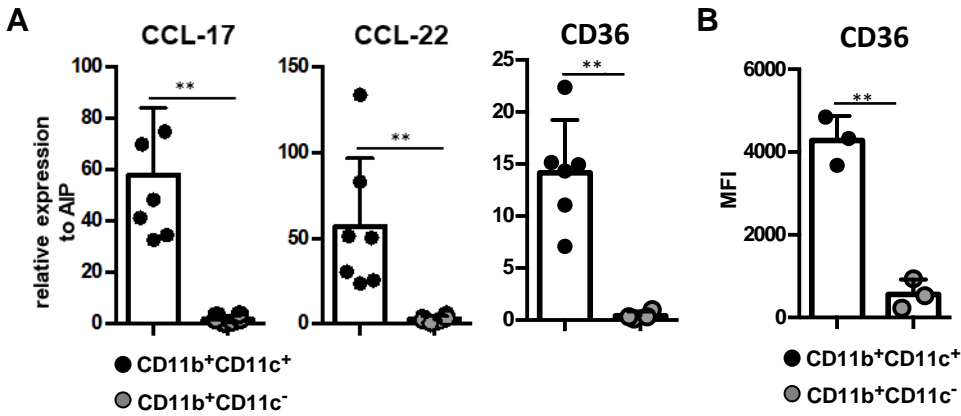

**Suppl. Figure 3: CD11b<sup>+</sup>CD11c<sup>+</sup> MDSCs express higher levels of CCL17, CCL22 and CD36 compared to CD11b<sup>+</sup>CD11c<sup>-</sup> MDSCs.** (A) CD11b<sup>+</sup>CD11c<sup>+</sup> and CD11b<sup>+</sup>CD11c<sup>-</sup> MDSC subpopulations were isolated from in vitro-generated MDSCs after 4 days in culture. mRNA expression of CCL-17, CCL-22 and CD36 was analysed by qRT-PCR and relative expression was calculated. (B) CD36 surface expression was analyzed by flow cytometry and mean fluorescence intensity (MFI) of CD36 was calculated. (A) Data represent the mean value  $\pm$  SD of 4-7 samples/group. (B) Data represent the mean value  $\pm$  SD of 3 samples/group. (A-B) Mann-Whitney test. \*\* $\leq$ p0.01.

**Suppl. Tab. S1: Mice**

| <b>Mouse strain</b>                                       | <b>Short form</b>          | <b>Genotype</b>                 | <b>Sex</b> | <b>Age</b>    | <b>Supplier</b>                                                                                                |
|-----------------------------------------------------------|----------------------------|---------------------------------|------------|---------------|----------------------------------------------------------------------------------------------------------------|
| <b>B6-C-H2-K<sup>bm1</sup>/ByJ</b>                        | <b>B6.bm1</b>              | H-2K <sup>bm1</sup> ,<br>CD45.2 | Female     | 9-20<br>weeks | Bred at University<br>of Ulm;<br>originally obtained<br>from Jackson<br>Laboratory                             |
| <b>B6.SJL-<br/>Ptprc<sup>a</sup>Pep3<sup>b</sup>/BoyJ</b> | <b>B6.SJL</b>              | H-2 <sup>b</sup> ;<br>CD45.1    | Female     | 6-9<br>weeks  | Bred at University<br>of Ulm;<br>originally obtained<br>from Jackson<br>Laboratory                             |
| <b>B6.129(C)-Stat6<sup>tm1Gru</sup>/J</b>                 | <b>STAT6<sup>-/-</sup></b> | H-2 <sup>b</sup>                | Female     | 6-9<br>weeks  | Bred at University<br>of Ulm;<br>originally obtained<br>from Jackson<br>Laboratory                             |
| <b>B7-H1 deficient mice<br/>[1]</b>                       | <b>PD-L1<sup>-/-</sup></b> | H-2 <sup>b</sup>                | Female     | 6-9<br>weeks  | Bone marrow cells<br>provided by R.<br>Schirmbeck;<br>Internal Medicine I,<br>University Medical<br>Center Ulm |
| <b>C57BL/6</b>                                            | <b>B6</b>                  | H-2 <sup>b</sup> ;<br>CD45.2    | Female     | 6-9<br>weeks  | Janvier                                                                                                        |
| <b>DBA/2</b>                                              |                            | H-2 <sup>d</sup> ;<br>CD45.2    | Female     | 6-9<br>weeks  | Janvier                                                                                                        |

[1] Dong H, Zhu G, Tamada K, Flies DB, van Deursen JMA, Chen L (2004) B7-H1 Determines Accumulation and Deletion of Intrahepatic CD8<sup>+</sup> T Lymphocytes. *Immunity* 20:327–336

**Suppl. Tab. S2. Antibodies for flow cytometry**

| <b>target protein</b> | <b>supplier</b>         | <b>clone</b> | <b>fluorochrom</b>     | <b>category</b>          | <b>RRID</b>            |
|-----------------------|-------------------------|--------------|------------------------|--------------------------|------------------------|
| <b>CD11b</b>          | ThermoFisher Scientific | M1/70        | APC<br>Alexa Fluor 700 | 56-0112-80<br>17-0112-81 | AB_657586<br>AB_469342 |
| <b>CD11c</b>          | ThermoFisher Scientific | N418         | PE<br>Pe-Cyanine 7     | 12-0114-81<br>25-0114-81 | AB_465551<br>AB_469589 |
| <b>CD36</b>           | BioLegend               | HM36         | PE                     | 102605                   | AB_389348              |
| <b>CD3ε</b>           | ThermoFisher Scientific | 145-2C11     | Pe-Cyanine 7           | 25-0031-81               | AB_469571              |
| <b>CD4</b>            | ThermoFisher Scientific | GK1.5        | APC-eFluor 780         | 47-0041-80               | AB_11219883            |
| <b>CD40</b>           | ThermoFisher Scientific | 1C10         | APC                    | 17-0401-81               | AB_469385              |
| <b>CD45.1</b>         | BD Biosciences          | A20          | V450                   | 560520                   | AB_1727490             |
| <b>CD80</b>           | ThermoFisher Scientific | 6-10A1       | PE                     | 12-0801-81               | AB_465751              |
| <b>CD86</b>           | ThermoFisher Scientific | GL1          | FITC                   | 11-0862-81               | AB_465147              |
| <b>CD8a</b>           | ThermoFisher Scientific | 53-6.7       | APC                    | 17-0081-81               | AB_469334              |
| <b>F4/80</b>          | ThermoFisher Scientific | BM8          | eFluor 450             | 48-4801-80               | AB_1548756             |
| <b>Gr-1</b>           | ThermoFisher Scientific | RB6-8C5      | eFluor 450             | 48-5931-80               | AB_1548797             |
| <b>I-Ab</b>           | BD Biosciences          | AF6-120.1    | FITC                   | 553551                   | AB_394918              |
| <b>Ly-6C</b>          | ThermoFisher Scientific | HK1.4        | APC-eFluor 780         | 47-5932-80               | AB_2573991             |
| <b>Ly-6G</b>          | BD Biosciences          | 1A8          | V450                   | 560603                   | AB_1727564             |
| <b>PD-L1</b>          | ThermoFisher Scientific | MIH5         | PE                     | 12-5982-81               | AB_466088              |
| <b>PD-L2</b>          | ThermoFisher Scientific | 122          | FITC                   | 11-9972-81               | AB_465461              |

**Suppl. Tab. S3. Primer for qRT-PCR**

| <b>target</b>                          | <b>sequence (5'→3')</b>         |
|----------------------------------------|---------------------------------|
| <b>AIP forward</b>                     | GCTCCGTTATAGATGACAGC            |
| <b>AIP reverse</b>                     | ATCTCGATGTGGAAGATGAG            |
| <b>arginase 1 forward</b>              | TCCTTTCAAATTGTGAAGAACCCACGGTC   |
| <b>arginase 1 reverse</b>              | AGAATCCTGGTACATCTGGGAACCTTTCCT  |
| <b>CCL17 forward</b>                   | ATCCCTGGAACACTCCACTG            |
| <b>CCL17 reverse</b>                   | TGCTTCTGGGGACTTTTCTG            |
| <b>CCL22 forward</b>                   | TCCTCCTCCCTAGGACAGTTT           |
| <b>CCL22 reverse</b>                   | TCTGGACCTCAAAATCCTGC            |
| <b>CD36 forward</b>                    | TCGGAACTGTGGGCTCATTGC           |
| <b>CD36 reverse</b>                    | GCCACGTCATCTGGGTTTTGC           |
| <b>HO-1 forward</b>                    | TCAAGGCCTCAGACAAATCC            |
| <b>HO-1 reverse</b>                    | ACAACCAGTGAGTGGAGCCT            |
| <b>IDO forward</b>                     | GGATGCCTGACTTTGTGGAC            |
| <b>IDO reverse</b>                     | TTCTTTGCCAGCCTCGTGT             |
| <b>IFN-<math>\gamma</math> forward</b> | TGCAGAGCCAGATTATCTCTTTCTACCTCAG |
| <b>IFN-<math>\gamma</math> reverse</b> | GGTTGTTGACCTCAAACCTGGCAATACTC   |
| <b>IL-10 forward</b>                   | CACTGCTATGCTGCCTGCTCTTACTGAC    |
| <b>IL-10 reverse</b>                   | TGGCAACCCAAGTAACCCTTAAAGTCCT    |
| <b>IL-13 forward</b>                   | CACACTCCATACCATGCTGC            |
| <b>IL-13 reverse</b>                   | TGTGTCTCTCCCTCTGACCC            |
| <b>IL-4 forward</b>                    | GGTGTCTTCGTTGCTGTGA             |
| <b>IL-4 reverse</b>                    | TCTCGAATGTACCAGGAGCC            |
| <b>IL-5 forward</b>                    | CCCACGGACAGTTTGATTCT            |
| <b>IL-5 reverse</b>                    | GCAATGAGACGATGAGGCTT            |
| <b>iNOS forward</b>                    | AGCAATGGGCAGACTCTGAAGAAATCTC    |
| <b>iNOS reverse</b>                    | ATGTTTGCTTCGGACATCAAAGGTCTCAC   |
| <b>TGF-<math>\beta</math> forward</b>  | TCTACCAGAAATATAGCAACAATTCCT     |
| <b>TGF-<math>\beta</math> reverse</b>  | CTGAATCGAAAGCCCTGTATTCCGTCTC    |
| <b>TNF<math>\alpha</math> forward</b>  | CCAGACCCTCACACTCAGATCA TCTTCTC  |
| <b>TNF<math>\alpha</math> reverse</b>  | CTAGTTGGTTGTCTTTGAGATCCATGCCGT  |

**Suppl. Tab. S4: GO terms of biological processes and linked target genes up-regulated in CD11b+CD11c+ MDSCs compared to CD11b+CD11c- MDSCs**

| <b>1.) cell movement and migration</b>    |              |                                                                                                                                                                                                                                                                                                                                                                                                                                                                                                          |
|-------------------------------------------|--------------|----------------------------------------------------------------------------------------------------------------------------------------------------------------------------------------------------------------------------------------------------------------------------------------------------------------------------------------------------------------------------------------------------------------------------------------------------------------------------------------------------------|
| <b>biological process</b>                 | <b>GO ID</b> | <b>linked target genes</b>                                                                                                                                                                                                                                                                                                                                                                                                                                                                               |
| cell motility                             | 0048870      | Nfatc2, Cxcl3, Lamc1, Emp2, Eng, Fscn1, Jup, rab13, Mmp14, 1600029D21Rik, Nrp2, Nrp1, Axl, Mmp12, Slamf8, Cxcl16, Pdpn, Ccl17, Ccl22, Plekho1, Itgb7, Ext1, Ch25h, Rhoc, Acvr1, Cd2ap, Nav1, Acvr11, Plekhg5, Tns1, Sema6d, Tubb2a, Nrg1, Gpr183, Cxcl2, Ctnn, Ccl9, Flrt3, Gpr35, Vav2, C230081A13Rik, Cx3cl1, Tesk1, Megf8, Ccl7, Pmp22, Ccr7, Lgals3, Mertk, Ptpro, Amical, Mcoln2, Insl6, Palld, Pld2, Met, Sdc3, Pf4, Sdc4                                                                          |
| cell migration                            | 0016477      | Nfatc2, Cxcl3, Emp2, Lamc1, Eng, Fscn1, Jup, Mmp14, Rab13, 1600029D21Rik, Nrp2, Nrp1, Axl, Mmp12, Slamf8, Cxcl16, Pdpn, Ccl2, Ccl17, Ccl22, Plekho1, Itgb7, Ext1, Rhoc, Acvr1, Cd2ap, Nav1, Plekhg5, Acvr11, Tns1, Sema6d, Tubb2a, Nrg1, Gpr183, Cxcl2, Ccl9, Flrt3, Gpr35, Vav2, Cx3cl1, C230081A13Rik, Tesk1, Megf8, Ccl7, Pmp22, Ccr7, Lgals3, Ccr5, Mertk, Ptpro, Fyn, Amical, Mcoln2, Palld, Met, Pf4, Sdc3, Sdc4                                                                                   |
| locomotion                                | 0040011      | Nfatc2, Cxcl3, Lamc1, Emp2, Eng, Fscn1, Jup, Rab13, Mmp14, 1600029D21Rik, Nrp2, Nrp1, Mmp12, Axl, Slamf8, Cxcl16, Pdpn, Ccl2, Ccl17, Ccl22, Plekho1, Itgb7, Ext1, Pdgfa, Ch25h, Rhoc, Acvr1, Cd2ap, Nav1, Acvr11, Plekhg5, Tns1, Sema6d, Tubb2a, Nrg1, Gpr183, Cxcl2, Ctnn, Ccl9, Flrt3, Gpr35, Vav2, C230081A13Rik, Cx3cl1, Megf8, Tesk1, Ccl7, Cysltr1, Pmp22, Ccr7, Lgals3, Ccr5, Mertk, Ptpro, Fyn, Amical, Mcoln2, Insl6, Palld, Pld2, Met, Cmtm3, Pf4, Sdc3, Sdc4                                  |
| lymphocyte migration                      | 0072676      | Ccr7, Ccl2, Ccl17, Ch25h, Ccl9, Ccl22, Cx3cl1, Gpr183, Itgb7, Cxcl16, Ext1, Ccl7                                                                                                                                                                                                                                                                                                                                                                                                                         |
| movement of cell or subcellular component | 0006928      | Nfatc2, Cxcl3, Emp2, Lamc1, Eng, Fscn1, Jup, Mmp14, Rab13, 1600029D21Rik, Nrp2, Nrp1, Mmp12, Uchl1, Axl, Slamf8, Cxcl16, Pdpn, Ccl2, Ccl17, Ccl22, Plekho1, Itgb7, Ext1, Ch25h, Rhoc, Acvr1, Cd2ap, Nav1, Acvr11, Plekhg5, Dst, Ift43, Tns1, Sema6d, Tubb2a, Nrg1, Gpr183, Nr4a3, Cxcl2, Ctnn, Ccl9, Flrt3, Gpr35, Plxna1, Vav2, C230081A13Rik, Evi, Cx3cl1, Megf8, Tesk1, Ccl7, Pmp22, Ccr7, Lgals3, Ccr5, Mertk, Ptpro, Fyn, Amical, Mcoln2, Insl6, Dpysl2, Palld, Pld2, Met, Pf4, Rasgrp1, Sdc3, Sdc4 |
| lymphocyte chemotaxis                     | 0048247      | Ccr7, Ccl2, Ccl17, Ch25h, Ccl22, Cx3cl1, Cxcl16, Ccl7                                                                                                                                                                                                                                                                                                                                                                                                                                                    |
| chemotaxis                                | 0006935      | Sema6d, Cxcl3, Nrg1, Gpr183, Eng, Cxcl2, Ccl9, Gpr35, Rab13, Nrp2, Cx3cl1, Slamf8, Cxcl16, Ccl7, Cysltr1, Ccl2, Ccr7, Ccl17, Lgals3, Ccr5, Ccl22, Ptpro, Pdgfa, Amical, Ch25h, Plekhg5, Cmtm3, Pf4                                                                                                                                                                                                                                                                                                       |
| taxis                                     | 0042330      | Sema6d, Cxcl3, Nrg1, Gpr183, Eng, Cxcl2, Ccl9, Gpr35, Nrp2, Cx3cl1, Slamf8, Cxcl16, Ccl7, Cysltr1, Ccl2, Ccr7,                                                                                                                                                                                                                                                                                                                                                                                           |

|                                                     |              |                                                                                                                                                                                                                                                                                                                         |
|-----------------------------------------------------|--------------|-------------------------------------------------------------------------------------------------------------------------------------------------------------------------------------------------------------------------------------------------------------------------------------------------------------------------|
|                                                     |              | Ccl17, Ccr5, Lgals3, Ccl22, Ptpro, Pdgfa, Amical, Ch25h, Plekhg5, Cmtm3, Pf4                                                                                                                                                                                                                                            |
| cell chemotaxis                                     | 0060326      | Ccr7, Ccl2, Ccr5, Lgals3, Ccl17, Cxcl3, Ccl22, Gpr183, Ptpro, Eng, Cxcl2, Amical, Ch25h, Ccl9, Gpr35, Rab13, Cx3cl1, Slamf8, Cxcl16, Plekhg5, Ccl7, Pf4                                                                                                                                                                 |
| monocyte chemotaxis                                 | 0002548      | Ccl2, Lgals3, Ccl17, Ccl22, Ccl9, Cx3cl1, Ptpro, Ccl7                                                                                                                                                                                                                                                                   |
| leukocyte chemotaxis                                | 0030595      | Ccl2, Ccr7, Ccl17, Ch25h, Ccl22, Cxcl3, Cx3cl1, Ptpro, Slamf8, Cxcl16, Ccl7, Pf4                                                                                                                                                                                                                                        |
| leukocyte migration                                 | 0050900      | Ccr7, Ccl2, Lgals3, Ccl17, Cxcl3, Ccl22, Gpr183, Ptpro, Itgb7, Ext1, Cxcl2, Amical, Ch25h, Ccl9, Mcoln2, Gpr35, Cx3cl1, Slamf8, Cxcl16, Ccl7, Pf4                                                                                                                                                                       |
| mononuclear cell migration                          | 0071674      | Ccl2, Ccl17, Lgals3, Amical, Ccl9, Ccl22, Cx3cl1, Ptpro, Ccl7                                                                                                                                                                                                                                                           |
| myeloid leukocyte migration                         | 0097529      | Ccl2, Ccr7, Ccl17, Ccl22, Cxcl3, Mcoln2, Cx3cl1, Ptpro, Ccl7, Pf4                                                                                                                                                                                                                                                       |
| <b>2.) cell adhesion</b>                            |              |                                                                                                                                                                                                                                                                                                                         |
| <b>biological process</b>                           | <b>GO ID</b> | <b>linked target genes</b>                                                                                                                                                                                                                                                                                              |
| biological adhesion                                 | 0022610      | Bcl2, Emp2, Lamc1, Tgfbi, Gbp3, Itga1, Eng, Jup, Stab1, Flrt3, Plxnb2, Adam23, C230081A13Rik, Cx3cl1, Nrp1, Axl, Igsf9, Mllt4, Tjp2, Serpinb8, Pdpn, Gpnmb, Cd6, Pmp22, Itgax, Lgals1, Mpzl3, Cdh1, Itgae, Mertk, Inpp1, Itgb7, Ext1, Cd200r1, Gbp2, Fblim1, Cd36, Amical, Acvr1, Cd2ap, Palld, Dst, Parvb, Sdc3, Mfge8 |
| cell adhesion                                       | 0007155      | Bcl2, Emp2, Lamc1, Tgfbi, Itga1, Eng, Jup, Stab1, Plxnb2, Flrt3, Adam23, Cx3cl1, C230081A13Rik, Nrp1, Axl, Igsf9, Mllt4, Tjp2, Serpinb8, Pdpn, Cd6, Gpnmb, Pmp22, Itgax, Lgals1, Mpzl3, Cdh1, Itgae, Mertk, Inpp1, Itgb7, Ext1, Cd200r1, Fblim1, Cd36, Amical, Acvr1, Cd2ap, Palld, Dst, Parvb, Sdc3, Mfge8             |
| positive regulation of cell-cell adhesion           | 0022409      | Ccl2, Pcd11g2, Ccr7, Il7r, H2-Ab1, H2-Aa, Aif1, Nr4a3, Cd74, Cd86, Cd83, Il2ra, Cx3cl1, Pdpn, Rasgrp1, Cd6                                                                                                                                                                                                              |
| positive regulation of cell adhesion                | 0045785      | Ccr7, Ccl2, Pcd11g2, Il7r, H2-Ab1, H2-Aa, Aif1, Emp2, Nr4a3, Cd74, Cd86, Cd36, Cd83, Il2ra, Cx3cl1, Pdpn, Cd6, Sdc4                                                                                                                                                                                                     |
| regulation of leukocyte cell-cell adhesion          | 1903037      | Ccl2, Ccr7, Pcd11g2, Il7r, H2-Ab1, Aif1, H2-Aa, Nr4a3, Cd74, Cd86, Cd83, Il2ra, Rasgrp1, Cd6, Sdc4                                                                                                                                                                                                                      |
| regulation of cell-cell adhesion                    | 0022407      | Aif1, Il1a, Trpv4, Nr4a3, Cd74, Myo10, Cd86, Zfp703, Cd83, Cx3cl1, Cd244, H2-M3, H2-DMA, Mllt4, Pdpn, Kifap3, Gpnmb, Cd6, Shb, Il6st, Pcd11g2, Ccr7, Ccl2, Lgals3, Ccr5, Klf4, Lgals1, Il7r, Cdh1, H2-Ab1, H2-Aa, Malt1, Hfe, Ass1, Tnfsf9, Il2ra, Cd1d1, Rasgrp1, Sdc4                                                 |
| <b>3.) leukocyte activation and immune response</b> |              |                                                                                                                                                                                                                                                                                                                         |
| <b>biological process</b>                           | <b>GO ID</b> | <b>linked target genes</b>                                                                                                                                                                                                                                                                                              |
| immune response                                     | 0006955      | Cxcl3, Emp2, Il1a, Rnase6, Cd74, Cd86, Slamf7, Axl, Traf3ip2, H2-DMA, Cd6, H2-DMb1, Serpinb9, Tnfrsf11a, Ccl2, Ccl17, Ccl22, Ext1, Tnfsf12, Mfhas1, Tnfsf8, Cd36,                                                                                                                                                       |



|                                                                                   |         |                                                                                                                                                                                                                                                                                                                                                                                                              |
|-----------------------------------------------------------------------------------|---------|--------------------------------------------------------------------------------------------------------------------------------------------------------------------------------------------------------------------------------------------------------------------------------------------------------------------------------------------------------------------------------------------------------------|
|                                                                                   |         | Cd1d1, Gpr183, Trem2, Cxcl2, Lta, Ptx3, Ccl9, Cx3cl1, Cd244, Irg1, Ccl7, Ctss, Pmp22, Cysltr1, Ccr7, Pcd11g2, Prdx1, Ccr5, Lgals3, Tmem106a, H2-Ab1, beta 1, H2-Aa, C1qc, Wfdc17, C1qb, H2-Eb1, Fyn, Mcoln2, Ly86, Il2ra, Rasgrp1, Pf4, Lat2                                                                                                                                                                 |
| lymphocyte migration                                                              | 0072676 | Ccr7, Ccl2, Ccl17, Ch25h, Ccl9, Ccl22, Cx3cl1, Gpr183, Itgb7, Cxcl16, Ext1, Ccl7                                                                                                                                                                                                                                                                                                                             |
| positive regulation of immune system process                                      | 0002684 | Bcl2, Nfatc2, Aif1, Gbp5, Il1a, Cd74, Cd86, Cd83, Mmp14, Pgf, Axl, Mmp12, Dcstamp, Car2, H2-DMA, Cd6, Shb, Ccl2, Cd40, Mfhas1, Cd36, Rftn1, Cacnb3, Cd1d1, Tnip3, Scimp, Stk39, Blnk, Gpr183, Trem2, Trpv4, Nr4a3, Lta, Lgmn, Cx3cl1, Cd244, Irg1, Gpr68, Pcd11g2, Il6st, Ccr7, Lgals3, Il7r, H2-Ab1, C1qc, H2-Aa, Pyhin1, C1qb, Fyn, Il2ra, Pld2, Cmtm3, BC096441, Nlrc5, Kenn4, Pf4, Rasgrp1, Lat2, Zbtb46 |
| lymphocyte chemotaxis                                                             | 0048247 | Ccr7, Ccl2, Ccl17, Ch25h, Ccl22, Cx3cl1, Cxcl16, Ccl7                                                                                                                                                                                                                                                                                                                                                        |
| monocyte chemotaxis                                                               | 0002548 | Ccl2, Lgals3, Ccl17, Ccl22, Ccl9, Cx3cl1, Ptpro, Ccl7                                                                                                                                                                                                                                                                                                                                                        |
| leukocyte chemotaxis                                                              | 0030595 | Ccl2, Ccr7, Ccl17, Ch25h, Ccl22, Cxcl3, Cx3cl1, Ptpro, Slamf8, Cxcl16, Ccl7, Pf4                                                                                                                                                                                                                                                                                                                             |
| positive regulation of lymphocyte activation                                      | 0051251 | Bcl2, Nfatc2, Aif1, Gpr183, Il1a, Cd74, Cd86, Cd83, Mmp14, Axl, Cd244, H2-M3, H2-DMA, Cd6, Shb, Ccl2, Il6st, Ccr7, Pcd11g2, Lgals1, Il7r, H2-Ab1, H2-Aa, Malt1, Cd40, Tlr9, Tnfsf9, Il2ra, Cd1d1, BC096441, Rasgrp1                                                                                                                                                                                          |
| positive regulation of leukocyte activation                                       | 0002696 | Bcl2, Nfatc2, Aif1, Gpr183, Il1a, Trem2, Nr4a3, Cd74, CD86, Mmp14, Cd83, Axl, Cd244, H2-M3, H2-DMA, Cd6, Shb, Ccl2, Pcd11g2, Ccr7, Il6st, Lgals1, Il7r, H2-Ab1, H2-Aa, Malt1, Cd40, Tlr9, Tnfsf9, Il2ra, Cd1d1, Pld2, BC096441, Rasgrp1                                                                                                                                                                      |
| leukocyte migration                                                               | 0050900 | Ccr7, Ccl2, Lgals3, Ccl17, Cxcl3, Ccl22, Gpr183, Ptpro, Itgb7, Ext1, Cxcl2, Amical, Ch25h, Ccl9, Mcoln2, Gpr35, Cx3cl1, Slamf8, Cxcl16, Ccl7, Pf4                                                                                                                                                                                                                                                            |
| defense response                                                                  | 0006952 | Cxcl3, Gbp5, Spire1, Il1a, Rnase6, Cd74, Cd86, Slamf7, Axl, Slamf8, Traf3ip2, Cd6, Serpinb9, Itgax, Ccl2, Ccl17, Ccl22, Cd40, Ext1, Gbp2, Mfhas1, Tnfsf8, Cd36, Acvr1, Cd1d1, Gbp3, Cst3, Trem2, Cxcl2, Lta, Ptx3, Ccl9, Cx3cl1, Cd244, Irg1, Ccl7, Cysltr1, Ccr7, Adra2a, Lgals3, Ccr5, Prdx1, Il7r, Tmem106a, C1qc, Ciita, Wfdc17, C1qb, Batf2, Fyn, Mcoln2, Ly86, Il2ra, Pf4, Rasgrp1                     |
| antigen processing and presentation of exogenous peptide antigen via MHC class II | 0019886 | Cd74, H2-Ab1, H2-Aa, H2-DMA, H2-DMb2, Ctss, H2-Eb1, H2-DMb1, Ifi30                                                                                                                                                                                                                                                                                                                                           |
| antigen processing and presentation of peptide antigen via MHC class II           | 0002495 | Cd74, H2-Ab1, H2-Aa, H2-DMA, H2-DMb2, Ifi30, H2-DMb1, H2-Eb1, Ctss                                                                                                                                                                                                                                                                                                                                           |

|                                                                                           |              |                                                                                                                                                                                                                                            |
|-------------------------------------------------------------------------------------------|--------------|--------------------------------------------------------------------------------------------------------------------------------------------------------------------------------------------------------------------------------------------|
| antigen processing and presentation of peptide or polysaccharide antigen via MHC class II | 0002504      | Cd74, H2-Ab1, H2-Aa, H2-DMA, H2-DMb2, Ctss, H2-Eb1, H2-DMb1, Ifi30                                                                                                                                                                         |
| positive regulation of leukocyte cell-cell adhesion                                       | 1903039      | Ccl2, Pdc11g2, Ccr7, Il7r, H2-Ab1, Aif1, H2-Aa, Nr4a3, Cd74, Cd86, Cd83, Il2ra, Rasgrp1, Cd6                                                                                                                                               |
| negative regulation of immune system process                                              | 0002683      | Pdc11g2, Il7r, Susd4, H2-Ab1, C1qc, H2-Aa, Mfhas1, H2-Ob, Cd74, Cd86, Il2ra, Cx3cl1, Klr1b, Axl, Mmp12, Slamf8, Pf4, Gpnmb, Sdc4, Zbtb46, Serpinb9                                                                                         |
| positive regulation of T cell activation                                                  | 0050870      | Ccl2, Pdc11g2, Ccr7, Il7r, H2-Ab1, Aif1, H2-Aa, Cd74, Cd86, Cd83, Il2ra, Cd6, Rasgrp1                                                                                                                                                      |
| mononuclear cell migration                                                                | 0071674      | Ccl2, Ccl17, Lgals3, Amical, Ccl9, Ccl22, Cx3cl1, Ptpro, Ccl7                                                                                                                                                                              |
| adaptive immune response                                                                  | 0002250      | Tnfrsf11a, Pdc11g2, Cd74, Fyn, Cd86, Mcoln2, H2-Ab1, H2-Aa, Emp2, Slamf7, H2-Eb1, Serpinb9                                                                                                                                                 |
| humoral immune response                                                                   | 0006959      | Ccl2, Lgals3, Ccl17, Cxcl3, Ccl22, H2-Ab1, C1qc, Gpr183, Wfdc17, C1qb, Rnase6, Cxcl2, Lta, Traf3ip2, Pf4                                                                                                                                   |
| regulation of leukocyte cell-cell adhesion                                                | 1903037      | Ccl2, Ccr7, Pdc11g2, Il7r, H2-Ab1, Aif1, H2-Aa, Nr4a3, Cd74, Cd86, Cd83, Il2ra, Rasgrp1, Cd6, Sdc4                                                                                                                                         |
| positive regulation of leukocyte differentiation                                          | 1902107      | Ccr7, Il7r, H2-Aa, Malt1, Trem2, Il1a, Cd74, Tnfsf9, Cd83, Mmp14, Il2ra, Axl, Cd1d1, Dcstamp, H2-M3, Car2, H2-DMA, Rasgrp1, Pf4, Gpr68, Zbtb46, Shb                                                                                        |
| myeloid leukocyte migration                                                               | 0097529      | Ccl2, Ccr7, Ccl17, Ccl22, Cxcl3, Mcoln2, Cx3cl1, Ptpro, Ccl7, Pf4                                                                                                                                                                          |
| inflammatory response                                                                     | 0006954      | Cxcl3, Gbp5, Trem2, Il1a, Cd180, Cxcl2, Lta, Ccl9, Stab1, Cx3cl1, Axl, Irg1, Traf3ip2, Ccl7, Cd6, Cysl1r1, Serpinb9, Ccr7, Ccl2, Adra2a, Ccr5, Ccl17, Ccl22, Ciita, Cd40, Ext1, Mfhas1, Tlr9, Ly86, Il2ra, Acvr1, Pld3, Pld4, Rasgrp1, Pf4 |
| regulation of leukocyte differentiation                                                   | 1902105      | Ccr7, Cd74, Il7r, Cd83, H2-Aa, C1qc, Il2ra, Dcstamp, Slamf8, Rasgrp1, Pf4, Zbtb46                                                                                                                                                          |
| antigen processing and presentation of exogenous peptide antigen                          | 0002478      | Cd74, H2-Ab1, H2-Aa, H2-DMA, H2-DMb2, Ctss, H2-DMb1, H2-Eb1, Ifi30                                                                                                                                                                         |
| myeloid leukocyte migration                                                               | 0097529      | Ccl2, Ccr7, Ccl17, Ccl22, Cxcl3, Mcoln2, Cx3cl1, Ptpro, Ccl7, Pf4                                                                                                                                                                          |
| <b>4.) ERK1 and ERK2 cascade</b>                                                          |              |                                                                                                                                                                                                                                            |
| <b>biological process</b>                                                                 | <b>GO ID</b> | <b>linked target genes</b>                                                                                                                                                                                                                 |
| regulation of ERK1 and ERK2 cascade                                                       | 0070372      | Ccl2, Tnfrsf11a, Ccl17, Ccl22, Pdgfa, Trpv4, Mfhas1, Cd74, Cd36, Tnfaip8l3, Cx3cl1, Ramp3, Scimp, Ccl7, Rasgrp1, Gpnmb                                                                                                                     |
| positive regulation of ERK1 and ERK2 cascade                                              | 0070374      | Ccl2, Tnfrsf11a, Ccl17, Ccl22, Pdgfa, Trpv4, Mfhas1, Cd74, Cd36, Tnfaip8l3, Cx3cl1, Ramp3, Scimp, Ccl7, Rasgrp1, Gpnmb                                                                                                                     |

| <b>5.) response to cytokine</b>      |              |                                                                                                                                   |
|--------------------------------------|--------------|-----------------------------------------------------------------------------------------------------------------------------------|
| <b>biological process</b>            | <b>GO ID</b> | <b>linked target genes</b>                                                                                                        |
| chemokine-mediated signaling pathway | 0070098      | Cxcl2, Ccl2, Stk39, Ccl17, Ccl9, Ccl22, Cxcl3, Gpr35, Ccl7, Pf4                                                                   |
| response to interferon-gamma         | 0034341      | Ccl2, Ccl17, Mrc1, Ccl22, H2-Ab1, H2-Aa, Cd40, Ciita, Gbp5, Gbp3, Gbp2, Kynu, H2-Eb1, Cd74, Ccl9, Evl, Cx3cl1, Cxcl16, Irg1, Ccl7 |
| <b>6.) response to stress</b>        |              |                                                                                                                                   |
| <b>biological process</b>            | <b>GO ID</b> | <b>linked target genes</b>                                                                                                        |
| response to tumor necrosis factor    | 0034612      | Tnfrsf11a, Ccl2, Ccl17, Ccl22, Cx3cl1, Cd40, Dcstamp, Cxcl16, Ccl7                                                                |

**Suppl. Tab. S5: GO terms of biological processes and linked target genes down-regulated in CD11b+CD11c+ MDSCs compared to CD11b+CD11c- MDSCs**

| <b>Immune and defense response</b>       |              |                                                                                                                                                                                                                                                                                               |
|------------------------------------------|--------------|-----------------------------------------------------------------------------------------------------------------------------------------------------------------------------------------------------------------------------------------------------------------------------------------------|
| <b>biological process</b>                | <b>GO ID</b> | <b>linked target genes</b>                                                                                                                                                                                                                                                                    |
| defense response                         | 0006952      | Fcgb, Ngp, Gal, Lbp, Cd177, Itgb2l, Camp, Pglyrp1, Elane, S100a8, S100a9, Mpo, Serpinb1a, Cd55, Ear6, Ltf, Chi3l3, Ctsg, Lcn2, Plac8                                                                                                                                                          |
| defense response to fungus               | 0050832      | Mpo, Ltf, Ctsg, Camp, Elane                                                                                                                                                                                                                                                                   |
| defense response to bacterium            | 0042742      | Mpo, Lbp, Ltf, Ctsg, Camp, Pglyrp1, Elane, Lcn2, Plac8                                                                                                                                                                                                                                        |
| antifungal humoral response              | 0019732      | Ltf, Camp                                                                                                                                                                                                                                                                                     |
| response to bacterium                    | 0009617      | Mpo, Slfn4, Lbp, Ltf, Ctsg, Camp, Pglyrp1, Elane, Lcn2, Lrg1, Plac8                                                                                                                                                                                                                           |
| response to fungus                       | 0009620      | Mpo, Ltf, Ctsg, Camp, Elane                                                                                                                                                                                                                                                                   |
| disruption of cells of other organism    | 0044364      | Ltf, Ctsg, Pglyrp, Camp, Elane, Trem3                                                                                                                                                                                                                                                         |
| killing of cells of other organism       | 0031640      | Ltf, Ctsg, Pglyrp1, Camp, Elane, Trem3,                                                                                                                                                                                                                                                       |
| regulation of inflammatory response      | 0050727      | Ets1, Pparg, Lbp, Nt5e, Cst7, Il17ra, Mefv, Il16, Fpr2, Cd55, Calcr1, C3, Pde2a, Alox5, Aldh2, Abcd2, Pglyrp1, S100a8, Bcr, S100a9, Il1r2, Tgm2, Ffar2, Cd47, Siglece, Ptges, Ager, Siglecg                                                                                                   |
| organ or tissue specific immune response | 0002251      | Ifnlr1, Ffar2, Ear6, Ltf, Camp                                                                                                                                                                                                                                                                |
| mucosal immune response                  | 0002385      | Ifnlr1, Ffar2, Ear6, Ltf, Camp                                                                                                                                                                                                                                                                |
| innate immune response in mucosa         | 0002227      | Ear6, Ltf, Camp                                                                                                                                                                                                                                                                               |
| regulation of defense response           | 0031347      | Ifnlr1, Ets1, Lbp, Pparg, Cst7, Nt5e, Nod1, Mefv, Il17ra, Cd37, Il16, Fpr2, Il27, Mmp2, Cd55, Ltf, Calcr1, Ceacam1, Irf7, C3, Pde2a, Fcgb, Alox5, Aldh2, Abcd2, Pglyrp1, S100a8, Trem3, S100a9, Bcr, Il1r2, Tgm2, Flot1, Ffar2, Gfi1, Serpinb1a, Tspan32, Cd47, Ptges, Siglece, Ager, Siglecg |
| humoral immune response                  | 0006959      | Fcgb, CD55, Ltf Ctsg, Pglyrp1, Camp, S100a9                                                                                                                                                                                                                                                   |
